# Supplementary material for: Thermal tolerance and cellular plasticity in marine phytoplankton diatoms modulated by epigenetic mechanisms for environmental adaptation
Source: Research Square preprint supplement (doi:10.21203/rs.3.rs-3919469/v1), 2024-02-16
Supplement: Supplementary file 1 [file 09398b0bbce22cb30e1318d7.xlsx]

## Sheet: Cell cycle
Gene_id	WT_1_fpkm	WT_2_fpkm	WT_3_fpkm	HSF2_11_fpkm	HSF2_12_fpkm	HSF2_13_fpkm	HSF2_21_fpkm	HSF2_22_fpkm	HSF2_23_fpkm	HSF2_1vsWT_log2FoldChange	HSF2_2vsWT_log2FoldChange	gene_length	gene_description	ko	Gene_name
Phatr3_J9344	157.652	162.81	133.173	460.942	624.043	601.637	534.483	636.279	647.131	1.89454	2.00267	2277	PF02724:CDC45-like protein	K06628	Cdc45-like					-
Phatr3_J13243	201.924	193.393	168.686	360.696	375.831	497.907	583.928	526.327	472.863	1.13008	1.489	2598	PF14551:MCM N-terminal domain|PF00493:MCM2/3/5 family	K02210	MCM7
Phatr3_J54505	3821.43	3974.89	4056.45	11958.3	9716.57	10114.8	11540.8	9846.1	10126.7	1.42333	1.41075	5344	PF02135:TAZ zinc finger|PF00569:Zinc finger, ZZ type|PF08214:Histone acetylation protein|PF00439:Bromodomain	K04498	p300
Phatr3_J51040	2092.66	2474.53	2746.03	6892.58	5745.17	6209.31	9798.46	8551.02	8549.78	1.36576	1.87899	10542	PF02260:FATC domain|PF00454:Phosphatidylinositol 3- and 4-kinase	K04728	ATM
Phatr3_J25506	90.7036	82.754	97.6602	177.069	220.113	197.088	303.737	179.348	174.268	1.1322	1.27775	4122	PF02463:RecF/RecN/SMC N terminal domain|PF06470:SMC proteins Flexible Hinge Domain	K06636	SMC1
Phatr3_J44708	3743.68	3723.93	3834.5	9383.73	7997.82	9380.35	14064.9	13488	12544.1	1.24359	1.82691	4872	PF02260:FATC domain|PF02259:FAT domain|PF00454:Phosphatidylinositol 3- and 4-kinase	K06640	ATR
Phatr3_J50138	329.341	371.494	358.679	1003.39	961.237	1012.41	995.975	820.133	880.906	1.49048	1.34796	5058	PF12765:HEAT repeat associated with sister chromatid cohesion|PF12830:Sister chromatid cohesion C-terminus	K06672	SCC2

## Sheet: AMPK signaling pathway
Gene_id	WT_1_fpkm	WT_2_fpkm	WT_3_fpkm	HSF2_11_fpkm	HSF2_12_fpkm	HSF2_13_fpkm	HSF2_21_fpkm	HSF2_22_fpkm	HSF2_23_fpkm	HSF2_1vsWT_log2FoldChange	HSF2_2vsWT_log2FoldChange	gene_length	gene_description	ko	Gene_name
Phatr3_J51017	16.2049	15.3221	15.2024	0.171582	0.10746	0.14317	0.0538482	0.499175	0.195628	-5.95089	-5.42616	1257	PF00149:Calcineurin-like phosphoesterase	K04382	PPP2C; serine/threonine-protein phosphatase 2A catalytic subunit [EC:3.1.3.16]
Phatr3_EG02516	2158.53	2467.33	2426.41	6948.79	5530.92	6679.21	9725.47	8702.42	10389.2	1.44186	2.03076	3579	PF02260:FATC domain|PF08771:Rapamycin binding domain|PF00454:Phosphatidylinositol 3- and 4-kinase|PF02259:FAT domain	K07203	TORC
Phatr3_EG02521	495.63	514.514	459.003	2160.43	1715.24	1269.66	2394.58	1834.94	2097.6	1.80828	2.10657	5907	PF11865:Domain of unknown function (DUF3385)	K07203

## Sheet: Membrane lipid
Gene_id	WT_1_fpkm	WT_2_fpkm	WT_3_fpkm	HSF2_11_fpkm	HSF2_12_fpkm	HSF2_13_fpkm	HSF2_21_fpkm	HSF2_22_fpkm	HSF2_23_fpkm	HSF2_1vsWT_log2FoldChange	HSF2_2vsWT_log2FoldChange	gene_length	gene_description	ko	Gene_name
Phatr3_J46275	3.30909	2.83017	2.793	16.0416	27.0364	19.6223	19.5576	22.8864	21.4018	2.71241	2.78096	1284	PF00487:Fatty acid desaturase		FAD

## Sheet: ABC transporter
Gene_id	WT_1_fpkm	WT_2_fpkm	WT_3_fpkm	HSF2_11_fpkm	HSF2_12_fpkm	HSF2_13_fpkm	HSF2_21_fpkm	HSF2_22_fpkm	HSF2_23_fpkm	HSF2_1vsWT_log2FoldChange	HSF2_2vsWT_log2FoldChange	gene_length	gene_description	ko	Gene_name
Phatr3_J42881	492.391	425.464	391.529	105.867	180.305	163.894	138.918	148.705	216.773	-1.54068	-1.37626	2100	PF09818:Predicted ATPase of the ABC class		ABC
Phatr3_J21207	112.3	50.372	37.2884	4.68437	3.51244	0	2.35455	8.11121	6.37568	-4.60851	-3.56963	1667	PF03109:ABC1 family		ABC1
Phatr3_Jdraft1613	19435.4	11877	10899.8	628.642	492.912	544.585	820.561	819.232	743.829	-4.66308	-4.14643	3753	PF00005:ABC transporter|PF00664:ABC transporter transmembrane region		ABC_membrane
Phatr3_J44753	572.297	619.756	664.977	0.873279	1.11326	0.912256	1.21064	1.38437	1.59456	-9.32333	-8.79198	1119	PF01061:ABC-2 type transporter		ABC2_membrane

## Sheet: Carbohydrate metabolism
	gene_id	WT_1_fpkm	WT_2_fpkm	WT_3_fpkm	HSF2_11_fpkm	HSF2_12_fpkm	HSF2_13_fpkm	HSF2_21_fpkm	HSF2_22_fpkm	HSF2_23_fpkm	HSF2_1vsWT_log2FoldChange	HSF2_2vsWT_log2FoldChange	gene_length	gene_description	ko	Gene_name
Glycolysis / Gluconeogenesis	Phatr3_J41470	62.9174	56.8575	57.4322	0	0	0	0.1343	0.103747	0	-8.50493	-8.14072	1008	PF00248:Aldo/keto reductase family	K00002	AKR1A1, adh; alcohol dehydrogenase (NADP+) [EC:1.1.1.2]
	Phatr3_EG02178	98.5602	90.2304	97.8889	39.0918	45.1059	49.2045	51.6517	46.375	43.3993	-1.08851	-1.00771	840	PF00107:Zinc-binding dehydrogenase	K00121	frmA, ADH5, adhC; S-(hydroxymethyl)glutathione dehydrogenase / alcohol dehydrogenase [EC:1.1.1.284 1.1.1.1]
	Phatr3_J51128	477.621	282.831	260.242	161.05	120.388	110.365	108.184	182.727	152.358	-1.33465	-1.16807	1292	PF02800:Glyceraldehyde 3-phosphate dehydrogenase, C-terminal domain|PF00044:Glyceraldehyde 3-phosphate dehydrogenase, NAD binding domain	K00134	GAPC2A
	Phatr3_J25308	37.9642	42.9657	53.8695	15.3722	25.5511	20.8739	29.0193	17.0611	15.3607	-1.09611	-1.10004	1845	PF00121:Triosephosphate isomerase|PF00044:Glyceraldehyde 3-phosphate dehydrogenase, NAD binding domain|PF02800:Glyceraldehyde 3-phosphate dehydrogenase, C-terminal domain	K00134	TPI/GAPC3
	Phatr3_J55035	58.2085	84.2095	75.6858	26.5524	42.7689	33.1199	29.1319	18.5943	18.5358	-1.06271	-1.67768	1257	PF00676:Dehydrogenase E1 component	K00161	PDHA1
	Phatr3_J20183	154.449	208.612	208.995	83.3939	74.8347	98.3183	102.062	71.5528	76.8027	-1.13544	-1.16966	1083	PF02779:Transketolase, pyrimidine binding domain|PF02780:Transketolase, C-terminal domain	K00162	PDHB1
	Phatr3_EG02228	15.2495	6.62456	9.32161	3.29641	3.44082	3.17258	3.51408	3.42501	4.41459	-1.56979	-1.39534	2061	PF07992:Pyridine nucleotide-disulphide oxidoreductase|PF02852:Pyridine nucleotide-disulphide oxidoreductase, dimerisation domain|PF00610:Domain found in Dishevelled, Egl-10, and Pleckstrin (DEP)	K00382	DLD, lpd, pdhD; dihydrolipoamide dehydrogenase [EC:1.8.1.4]
	Phatr3_J55079	36.6966	34.0792	19.4587	8.77266	12.3667	11.6303	8.09637	8.35905	9.23537	-1.40898	-1.76126	1764	PF02887:Pyruvate kinase, alpha/beta domain|PF00224:Pyruvate kinase, barrel domain	K00873	PK6
	Phatr3_J45997	26.9382	33.6809	29.1174	2.80655	2.27258	3.4378	4.80429	4.15119	5.1715	-3.31321	-2.62456	1902	PF00224:Pyruvate kinase, barrel domain|PF02887:Pyruvate kinase, alpha/beta domain	K00873	PK4A
	Phatr3_J46001	31.5872	37.288	31.0789	14.7364	13.7282	17.8479	16.4317	11.9776	10.8773	-1.09011	-1.32205	1899	PF00224:Pyruvate kinase, barrel domain|PF02887:Pyruvate kinase, alpha/beta domain	K00873	PK4B
	Phatr3_EG02232	545.462	412.924	309.796	156.819	141.695	141.995	90.1898	104.226	114.986	-1.49004	-1.99362	5664	PF13041:PPR repeat family|PF01293:Phosphoenolpyruvate carboxykinase	K01610	PTPEPCK
	Phatr3_J42447	527.643	338.161	285.488	130.303	45.2401	39.4067	69.0695	82.8288	90.4357	-1.91543	-2.19435	1469	ALDO; fructose-bisphosphate aldolase, class I [EC:4.1.2.13]	K01623	FBA4
	gene_id	WT_1_fpkm	WT_2_fpkm	WT_3_fpkm	HSF2_11_fpkm	HSF2_12_fpkm	HSF2_13_fpkm	HSF2_21_fpkm	HSF2_22_fpkm	HSF2_23_fpkm	HSF2_1vsWT_log2FoldChange	HSF2_2vsWT_log2FoldChange	gene_length	gene_description	ko	Gene_name
Citrate cycle (TCA cycle)	Phatr3_J55035	58.2085	84.2095	75.6858	26.5524	42.7689	33.1199	29.1319	18.5943	18.5358	-1.06271	-1.67768	1257	PF00676:Dehydrogenase E1 component	K00161	PDHA1
	Phatr3_J20183	154.449	208.612	208.995	83.3939	74.8347	98.3183	102.062	71.5528	76.8027	-1.13544	-1.16966	1083	PF02779:Transketolase, pyrimidine binding domain|PF02780:Transketolase, C-terminal domain	K00162	PDHB1
	Phatr3_J52539	216.336	188.139	152.635	69.3348	65.895	71.1537	45.0424	48.0902	48.463	-1.40849	-1.94747	822	PF13534:4Fe-4S dicluster domain|PF13085:2Fe-2S iron-sulfur cluster binding domain	K00235	SDH2
	Phatr3_EG02228	15.2495	6.62456	9.32161	3.29641	3.44082	3.17258	3.51408	3.42501	4.41459	-1.56979	-1.39534	2061	PF07992:Pyridine nucleotide-disulphide oxidoreductase|PF02852:Pyridine nucleotide-disulphide oxidoreductase, dimerisation domain|PF00610:Domain found in Dishevelled, Egl-10, and Pleckstrin (DEP)	K00382	DLD, lpd, pdhD; dihydrolipoamide dehydrogenase [EC:1.8.1.4]
	Phatr3_EG02232	545.462	412.924	309.796	156.819	141.695	141.995	90.1898	104.226	114.986	-1.49004	-1.99362	5664	PF13041:PPR repeat family|PF01293:Phosphoenolpyruvate carboxykinase	K01610	PTPEPCK
	gene_id	WT_1_fpkm	WT_2_fpkm	WT_3_fpkm	HSF2_11_fpkm	HSF2_12_fpkm	HSF2_13_fpkm	HSF2_21_fpkm	HSF2_22_fpkm	HSF2_23_fpkm	HSF2_1vsWT_log2FoldChange	HSF2_2vsWT_log2FoldChange	gene_length	gene_description	ko	Gene_name
Pyruvate metabolism	Phatr3_J41470	62.9174	56.8575	57.4322	0	0	0	0.1343	0.103747	0	-8.50493	-8.14072	1008	PF00248:Aldo/keto reductase family	K00002	-
	Phatr3_EG02178	98.5602	90.2304	97.8889	39.0918	45.1059	49.2045	51.6517	46.375	43.3993	-1.08851	-1.00771	840	PF00107:Zinc-binding dehydrogenase	K00121	-
	Phatr3_J55035	58.2085	84.2095	75.6858	26.5524	42.7689	33.1199	29.1319	18.5943	18.5358	-1.06271	-1.67768	1257	PF00676:Dehydrogenase E1 component	K00161	PDHA1
	Phatr3_J20183	154.449	208.612	208.995	83.3939	74.8347	98.3183	102.062	71.5528	76.8027	-1.13544	-1.16966	1083	PF02779:Transketolase, pyrimidine binding domain|PF02780:Transketolase, C-terminal domain	K00162	PDHB1
	Phatr3_EG02228	15.2495	6.62456	9.32161	3.29641	3.44082	3.17258	3.51408	3.42501	4.41459	-1.56979	-1.39534	2061	PF07992:Pyridine nucleotide-disulphide oxidoreductase|PF02852:Pyridine nucleotide-disulphide oxidoreductase, dimerisation domain|PF00610:Domain found in Dishevelled, Egl-10, and Pleckstrin (DEP)	K00382	-
	Phatr3_J55079	36.6966	34.0792	19.4587	8.77266	12.3667	11.6303	8.09637	8.35905	9.23537	-1.40898	-1.76126	1764	PF02887:Pyruvate kinase, alpha/beta domain|PF00224:Pyruvate kinase, barrel domain	K00873	PK6
	Phatr3_J45997	26.9382	33.6809	29.1174	2.80655	2.27258	3.4378	4.80429	4.15119	5.1715	-3.31321	-2.62456	1902	PF00224:Pyruvate kinase, barrel domain|PF02887:Pyruvate kinase, alpha/beta domain	K00873	PK4A
	Phatr3_J46001	31.5872	37.288	31.0789	14.7364	13.7282	17.8479	16.4317	11.9776	10.8773	-1.09011	-1.32205	1899	PF00224:Pyruvate kinase, barrel domain|PF02887:Pyruvate kinase, alpha/beta domain	K00873	PK4B
	Phatr3_J27976	39.9647	32.1075	42.507	12.6169	16.0933	16.0958	15.1682	14.8582	11.6257	-1.33075	-1.43629	3030	PF00311:Phosphoenolpyruvate carboxylase	K01595	PTPEPC2
	Phatr3_EG02232	545.462	412.924	309.796	156.819	141.695	141.995	90.1898	104.226	114.986	-1.49004	-1.99362	5664	PF13041:PPR repeat family|PF01293:Phosphoenolpyruvate carboxykinase	K01610	PTPEPCK
